# Supplementary material for: Improved Adsorption and Photocatalytic Degradation of Methyl Orange by Onion-like Nanocarbon/TiO2 Nanocomposites
Source: MDPI journal article supplement (doi:10.3390/app13085125), 2023-04-20
Supplement: s1 [file s1]

Archive with 1 entries (1 files):
- applsci-2301677-supplementary.pdf
